# Supplementary material for: Sugar–nucleobase hydrogen bonding in cytidine 5′-monophosphate nucleotide-cadmium coordination complexes
Source: Royal Society of Chemistry journal article supplement (doi:10.1039/d4ce00150h), 2024-01-01
Supplement: d4ce00150h1.pdf [file d4ce00150h1.pdf]

## Supplementary Information

# Sugar-nucleobase Hydrogen Bonding in the Crystal Structure of Cytidine-5'-monophosphate Nucleotide Cadmium Coordination Complexes

*Yaqoot khan,<sup>a</sup> Ismail Ismail,<sup>b</sup> Hongwei Ma,<sup>c</sup> Zhonkui Li,<sup>a</sup> and Hui Li<sup>a\*</sup>*

<sup>a</sup>Key Laboratory of Cluster Science of Ministry of Education, School of Chemistry and Chemical Engineering, Beijing Institute of Technology, Beijing 100081, P. R. China.

<sup>b</sup>Department of Chemistry and Center for Diagnostics and Therapeutics, Georgia State University, Atlanta, Georgia 30303, United States of America.

<sup>c</sup>Analysis & Testing Center of Beijing Institute of Technology, Beijing 102488, P. R. China.

E-mail: [lihui@bit.edu.cn](mailto:lihui@bit.edu.cn)

Tel: 86-10-68912667-602

Fax: 86-10-68914780-804

## Table of Contents

|     |                                                                                  |    |
|-----|----------------------------------------------------------------------------------|----|
| 1.  | Crystallographic Data and Structural Information .....                           | 3  |
| 1.1 | Selected bond distances, bond angles, and Hydrogen bonds for complexes 1-5. .... | 3  |
| 2.  | Supporting information of Complex 1 .....                                        | 9  |
| 3.  | Supporting information of Complex 2 .....                                        | 12 |
| 4.  | Supporting information of Complex 3 .....                                        | 14 |
| 5.  | Supporting information of Complex 4 .....                                        | 18 |
| 6.  | Supporting information of Complex 5 .....                                        | 19 |
| 7.  | The PXRD Patterns of complexes 1-5 .....                                         | 21 |
| 8.  | The FT-IR Spectra of complexes 1-5 .....                                         | 22 |
| 9.  | The Solution-State UV/ <i>vis</i> Spectra of complexes 1-4 .....                 | 23 |
| 10. | The Solid-State UV/ <i>vis</i> Spectra of complexes 1-5 .....                    | 24 |
| 11. | The Solution-State CD spectra of CMP, dCMP, and complexes .....                  | 25 |
| 12. | The Thermo-Gravimetric Analysis of complexes 1-5 .....                           | 26 |

## 1. Crystallographic Data and Structural Information

### 1.1 Selected bond distances, bond angles, and Hydrogen bonds for complexes 1-5.

**Table S1.** Selected bond distances (Å) and angles (°) for complex 1.

|                 |            |                     |             |
|-----------------|------------|---------------------|-------------|
| Cd(1)–N(2)      | 2.2961(47) | Cd(1)–O(3)          | 2.3163(48)  |
| Cd(1)–N(1)      | 2.3011(50) | Cd(1)–O(5)          | 2.3434(42)  |
| Cd(1)–O(2)      | 2.3150(58) | Cd(1)–O(1)          | 2.4442(44)  |
| P(1)–O(4)       | 1.5088(47) | P(1)–O(5)           | 1.5232(46)  |
| P(1)–O(3)       | 1.5249(49) | P(1)–O(6)           | 1.6200(42)  |
|                 |            |                     |             |
| N(2)–Cd(1)–N(1) | 171.79(22) | O(5)–Cd(1)–O(1)     | 94.49(17)   |
| N(2)–Cd(1)–O(2) | 90.97(24)  | O(4)–P(1)–O(5)      | 113.03(27)  |
| N(1)–Cd(1)–O(2) | 97.15(22)  | O(4)–P(1)–O(3)      | 114.76(28)  |
| N(1)–Cd(1)–O(3) | 85.54(18)  | O(5)–P(1)–O(3)      | 111.11(26)  |
| O(2)–Cd(1)–O(3) | 90.44(17)  | O(4)–P(1)–O(6)      | 102.57(24)  |
| N(2)–Cd(1)–O(5) | 92.24(21)  | O(5)–P(1)–O(6)      | 106.97 (24) |
| N(1)–Cd(1)–O(5) | 87.54(17)  | O(3)–P(1)–O(6)      | 107.59(26)  |
| O(2)–Cd(1)–O(5) | 83.03(17)  | H(12E)–O(12)–H(12B) | 110.27      |
| O(3)–Cd(1)–O(5) | 169.83(16) | C(13)–O(6)–P(1)     | 117.47(36)  |
| N(2)–Cd(1)–O(1) | 85.08(20)  | Cd(1)–O(1)–H(1B)    | 113.41      |
| N(1)–Cd(1)–O(1) | 86.75(18)  | Cd(1)–O(1)–H(1D)    | 113.41      |
| O(2)–Cd(1)–O(1) | 175.26(20) | H(1B)–O(1)–H(1D)    | 110.86      |
| O(3)–Cd(1)–O(1) | 92.55(16)  | Cd(1)–O(2)–H(2C)    | 112.85      |

Symmetric mode: 1-X,1/2+Y, -Z; +X, +Y, -1+Z; 1-X, -1/2+Y, -Z; +X, +Y,1+Z

**Table S2.** Selected H-bonding distances (Å) and angles (°) for complex 1.

| D–H          | d(D–H) | d(H···A) | ∠DHA   | d(D···A) | A   | Symmetry             |
|--------------|--------|----------|--------|----------|-----|----------------------|
| O(12)–H(12E) | 0.850  | 1.980    | 173.56 | 2.827    | O5  | [ -x, y+1/2, -z+1]   |
| O(12)–H(12B) | 0.850  | 2.064    | 160.27 | 2.879    | O11 | [ -x+1, y+1/2, -z+1] |
| O(1)–H(1B)   | 0.850  | 2.117    | 137.05 | 2.800    | O4  | [ x+1, y, z]         |
| O(1)–H(1D)   | 0.850  | 2.214    | 135.95 | 2.886    | O12 | [ -x+1, y-1/2, -z+1] |
| N(5)–H(5B)   | 0.860  | 2.344    | 133.89 | 3.005    | O11 | [ x-1, y+1, z]       |
| N(5)–H(5C)   | 0.860  | 1.993    | 166.97 | 2.838    | O4  | [ -x, y+1/2, -z]     |
| O(10)–H(10A) | 0.820  | 2.046    | 148.63 | 2.779    | N4  | [ -x, y-1/2, -z+1]   |
| O(9)–H(9A)   | 0.820  | 1.810    | 171.48 | 2.624    | O8  | [ -x, y-1/2, -z+1]   |

**Table S3.** Selected bond distances (Å) and angles (°) for complex **2**.

|                   |            |                  |            |
|-------------------|------------|------------------|------------|
| Cd(1)–O(8)        | 2.2386(54) | Cd(1)–O(11)      | 2.3011(54) |
| Cd(1)–N(1)        | 2.2727(68) | Cd(1)–O(14)      | 2.3068(57) |
| Cd(1)–N(8)        | 2.2828(64) | Cd(1)–O(6)       | 2.3308(50) |
| P(1)–O(1)         | 1.4857(61) | P(1)–O(4)        | 1.5106(67) |
| P(1)–O(6)         | 1.4924(54) | P(1)–O(16)       | 1.6110(63) |
| P(2)–O(8)         | 1.4762(62) | P(2)–O(13)       | 1.5367(64) |
| P(2)–O12          | 1.4897(68) | P(2)–O(10)       | 1.5980(68) |
|                   |            |                  |            |
| O(8)–Cd(1)–N(1)   | 91.04(24)  | O(14)–Cd(1)–O(6) | 91.68(21)  |
| O(8)–Cd(1)–N(8)   | 97.63(25)  | O(1)–P(1)–O(6)   | 112.69(33) |
| N(1)–Cd(1)–N(8)   | 169.51(27) | O(1)–P(1)–O(4)   | 113.13(37) |
| O(8)–Cd(1)–O(11)  | 92.41(22)  | O(6)–P(1)–O(4)   | 111.74(36) |
| N(1)–Cd(1)–O(11)  | 84.21(26)  | O(1)–P(1)–O(16)  | 102.50(36) |
| N(8)–Cd(1)–O(11)  | 89.51(28)  | O(6)–P(1)–O(16)  | 107.58(34) |
| O(8)–Cd(1)–O(14)  | 173.22(23) | O(4)–P(1)–O(16)  | 108.57(40) |
| N(1)–Cd(1)–O(14)  | 84.82(25)  | O(8)–P(2)–O(12)  | 118.03(38) |
| N(8)–Cd(1)–O(14)  | 87.08(25)  | O(8)–P(2)–O(13)  | 112.26(34) |
| O(11)–Cd(1)–O(14) | 92.51(22)  | O(12)–P(2)–O(13) | 106.54(40) |
| O(8)–Cd(1)–O(6)   | 83.11(20)  | O(8)–P(2)–O(10)  | 103.98(34) |
| N(1)–Cd(1)–O(6)   | 92.36(23)  | O(12)–P(2)–O(10) | 110.48(37) |
| N(8)–Cd(1)–O(6)   | 94.53(25)  | O(13)–P(2)–O(10) | 104.83(39) |
| O(11)–Cd(1)–O(6)  | 174.32(24) |                  |            |

Symmetric mode: -1+X, +Y, +Z; 1+X, +Y, +Z

**Table S4.** Selected H-bonding distances (Å) and angles (°) for complex **2**.

| D–H          | d(D–H) | d(H···A) | ∠DHA  | d(D···A) | A   | Symmetry              |
|--------------|--------|----------|-------|----------|-----|-----------------------|
| O(14)–H(14A) | 0.85   | 1.91     | 153.6 | 2.697    | O1  |                       |
| O(14)–H(14B) | 0.85   | 2.08     | 137.7 | 2.773    | O17 | [-x, y+1/2, -z+1/2]   |
| O(20)–H(20)  | 0.82   | 2.08     | 142.3 | 2.775    | O4  | [x+1/2, -y+3/2, -z+1] |
| O(11)–H(11A) | 0.85   | 1.85     | 151.9 | 2.629    | O1  | [-x, y-1/2, -z+1/2]   |
| O(11)–H(11B) | 0.85   | 2.02     | 173.5 | 2.865    | O2  |                       |
| N(2)–H(2)    | 0.78   | 2.11     | 168.0 | 2.877    | N3  | [-x+1, y-1/2, -z+1/2] |
| N(5)–H(5B)   | 0.86   | 2.13     | 168.9 | 2.976    | O4  | [-x, y-1/2, -z+1/2]   |
| N(5)–H(5A)   | 0.86   | 1.97     | 173.9 | 2.822    | O3  | [-x+1, y-1/2, -z+1/2] |
| O(15)–H(15)  | 0.82   | 1.84     | 158.5 | 2.621    | O9  |                       |
| N(7)–H(7A)   | 0.86   | 2.12     | 171.7 | 2.970    | O7  | [-x+1, y+1/2, -z+1/2] |
| O(17)–H(17A) | 0.85   | 1.87     | 148.2 | 2.632    | O12 |                       |
| O(9)–H(9B)   | 0.85   | 1.88     | 158.9 | 2.690    | O4  | [x+1/2, -y+3/2, -z+1] |

**Table S5.** Selected bond distances (Å) and angles (°) for complex **3**.

|                 |            |                 |            |
|-----------------|------------|-----------------|------------|
| Cd(1)–O(1)      | 2.250(3)   | Cd(1)–N(4)      | 2.344(3)   |
| Cd(1)–O(2)      | 2.234(3)   | P(1)–O(5)       | 1.516(2)   |
| Cd(1)–O(3)      | 2.300(3)   | P(1)–O(6)       | 1.514(3)   |
| Cd(1)–O(4)      | 2.339(3)   | P(1)–O(7)       | 1.615(2)   |
| Cd(1)–N(1)      | 2.330(3)   | P(1)–O(8)       | 1.514(3)   |
| O(1)–Cd(1)–O(3) | 91.79(9)   | O(3)–Cd(1)–N(4) | 86.47(12)  |
| O(1)–Cd(1)–O(4) | 176.04(11) | O(4)–Cd(1)–N(4) | 87.38(11)  |
| O(1)–Cd(1)–N(1) | 87.50(11)  | N(1)–Cd(1)–O(4) | 92.11(10)  |
| O(1)–Cd(1)–N(4) | 92.99(11)  | N(1)–Cd(1)–N(4) | 179.47(11) |
| O(2)–Cd(1)–O(1) | 93.12(10)  | O(5)–P(1)–O(7)  | 102.93(13) |
| O(2)–Cd(1)–O(3) | 173.89(10) | O(6)–P(1)–O(5)  | 113.56(15) |
| O(2)–Cd(1)–O(4) | 90.83(10)  | O(6)–P(1)–O(7)  | 106.85(14) |
| O(2)–Cd(1)–N(1) | 90.54(13)  | O(6)–P(1)–O(8)  | 112.41(17) |
| O(2)–Cd(1)–N(4) | 89.63(13)  | O(8)–P(1)–O(5)  | 112.46(16) |
| O(3)–Cd(1)–O(4) | 84.30(11)  | O(8)–P(1)–O(7)  | 107.84(16) |
| O(3)–Cd(1)–N(1) | 93.32(12)  |                 |            |

Symmetric mode: +X, +Y, -1+Z; +X, +Y, 1+Z

**Table S6.** Selected H-bonding distances (Å) and angles (°) for complex **3**.

| D–H          | d(D–H) | d(H···A) | ∠DHA  | d(D···A) | A   | Symmetry            |
|--------------|--------|----------|-------|----------|-----|---------------------|
| O(1)–H(1A)   | 0.85   | 1.82     | 171.2 | 2.664    | O5  |                     |
| O(1)–H(1B)   | 0.86   | 2.01     | 135.0 | 2.688    | O6  | [ 2-X, 1/2+Y, 1-Z]  |
| O(2)–H(2A)   | 0.85   | 1.80     | 164.1 | 2.623    | O15 | [ 1-X, -1/2+Y, 1-Z] |
| O(2)–H(2B)   | 0.85   | 1.89     | 159.1 | 2.698    | O6  |                     |
| O(3)–H(3A)   | 0.89   | 1.72     | 162.2 | 2.580    | O8  | [ 2-X, 1/2+Y, 1-Z]  |
| O(3)–H(3B)   | 0.89   | 1.87     | 161.7 | 2.728    | O14 | [ 1-X, 1/2+Y, 1-Z]  |
| O(4)–H(4B)   | 0.88   | 1.81     | 157.5 | 2.646    | O8  | [ -1+X, +Y, +Z]     |
| O(10)–H(10A) | 0.82   | 1.79     | 164.5 | 2.585    | O12 | [ 2-X, -1/2+Y, 2-Z] |
| O(11)–H(11)  | 0.82   | 2.06     | 168.1 | 2.863    | N6  | [ 2-X, -1/2+Y, 2-Z] |
| N(7)–H(7B)   | 0.86   | 1.97     | 168.2 | 2.818    | O5  | [ -X, 1/2+Y, 1-Z]   |
| O(13)–H(13A) | 0.85   | 1.97     | 166.8 | 2.805    | O10 |                     |
| O(13)–H(13B) | 0.85   | 2.00     | 172.5 | 2.846    | O6  |                     |
| O(14)–H(14C) | 0.85   | 1.97     | 150.8 | 2.746    | O13 |                     |
| O(15)–H(15A) | 0.85   | 2.01     | 158.0 | 2.819    | O5  | [ -1+X, +Y, +Z]     |

**Table S7.** Selected bond distances (Å) and angles (°) for complex 4.

|                 |            |                  |            |
|-----------------|------------|------------------|------------|
| Cd(1)–O(1)      | 2.245(3)   | P(1)–O(5)        | 1.563(4)   |
| Cd(1)–O(2)      | 2.232(3)   | P(1)–O(6)        | 1.491(4)   |
| Cd(1)–O(3)      | 2.319(3)   | P(1)–O(7)        | 1.598(4)   |
| Cd(1)–O(4)      | 2.299(3)   | P(2)–O(2)        | 1.520(3)   |
| Cd(1)–N(1)      | 2.315(3)   | P(2)–O(11)       | 1.496(3)   |
| Cd(1)–N(2)      | 2.325(4)   | P(2)–O(12)       | 1.516(4)   |
| P(1)–O(1)       | 1.495(3)   | P(2)–O(13)       | 1.607(3)   |
|                 |            |                  |            |
| O(1)–Cd(1)–O(2) | 84.41(11)  | N(2)–Cd(1)–O(2)  | 92.16(13)  |
| O(1)–Cd(1)–O(3) | 174.72(12) | O(1)–P(1)–O(5)   | 112.00(19) |
| O(1)–Cd(1)–O(4) | 92.29(12)  | O(1)–P(1)–O(7)   | 104.44(19) |
| O(1)–Cd(1)–N(1) | 96.34(14)  | O(5)–P(1)–O(7)   | 105.6(2)   |
| O(1)–Cd(1)–N(2) | 91.19(13)  | O(6)–P(1)–O(1)   | 117.6(2)   |
| O(3)–Cd(1)–O(2) | 91.04(11)  | O(6)–P(1)–O(5)   | 107.1(2)   |
| O(3)–Cd(1)–N(2) | 86.31(14)  | O(6)–P(1)–O(7)   | 109.5(2)   |
| O(4)–Cd(1)–O(2) | 176.20(13) | O(2)–P(2)–O(13)  | 107.36(18) |
| O(4)–Cd(1)–O(3) | 92.16(12)  | O(11)–P(2)–O(2)  | 113.20(18) |
| O(4)–Cd(1)–N(1) | 89.51(15)  | O(11)–P(2)–O(12) | 113.0(2)   |
| O(4)–Cd(1)–N(2) | 86.00(14)  | O(11)–P(2)–O(13) | 102.9(2)   |
| N(1)–Cd(1)–O(2) | 92.74(14)  | O(12)–P(2)–O(2)  | 111.6(2)   |
| N(1)–Cd(1)–O(3) | 86.52(14)  | O(12)–P(2)–O(13) | 108.1(2)   |
| N(1)–Cd(1)–N(2) | 171.39(14) |                  |            |

Symmetric mode: 1+X, +Y, +Z; -1+X, +Y, +Z

**Table S8.** Selected H-bonding distances (Å) and angles (°) for complex 4.

| D–H          | d(D–H) | d(H···A) | ∠DHA  | d(D···A) | A   | Symmetry            |
|--------------|--------|----------|-------|----------|-----|---------------------|
| O(3)–H(3A)   | 1.00   | 1.82     | 159.2 | 2.775    | O20 |                     |
| O(4)–H(4A)   | 0.96   | 1.78     | 150.7 | 2.661    | O11 | [ 2-X,1/2+Y,1/2-Z]  |
| O(4)–H(4B)   | 0.96   | 1.99     | 146.3 | 2.845    | O19 |                     |
| O(5)–H(5)    | 0.82   | 1.74     | 175.8 | 2.558    | O2  |                     |
| O(9)–H(9)    | 0.82   | 1.88     | 154.3 | 2.641    | O17 |                     |
| O(15)–H(15)  | 0.82   | 2.10     | 140.1 | 2.779    | O12 | [ -1/2+X,1/2-Y,1-Z] |
| N(6)–H(6)    | 0.86   | 2.00     | 173.9 | 2.856    | N9  | [ 1-X,1/2+Y,1/2-Z]  |
| N(7)–H(7A)   | 0.86   | 1.92     | 175.6 | 2.779    | O16 | [ 1-X,1/2+Y,1/2-Z]  |
| O(17)–H(17A) | 0.85   | 1.90     | 164.5 | 2.725    | O12 | [ -1/2+X,1/2-Y,1-Z] |
| O(17)–H(17B) | 0.85   | 2.00     | 167.1 | 2.836    | O18 |                     |
| O(19)–H(19A) | 0.85   | 2.00     | 170.1 | 2.841    | O20 |                     |
| O(20)–H(20A) | 0.85   | 1.99     | 161.9 | 2.812    | O9  | [3/2-X,1-Y, -1/2+Z] |
| O(20)–H(20B) | 0.85   | 1.85     | 164.3 | 2.680    | O6  | [3/2-X,1-Y, -1/2+Z] |

**Table S9.** Selected bond distances (Å) and angles (°) for complex **5**.

|                 |            |                 |            |
|-----------------|------------|-----------------|------------|
| Cd(1)–O(1)      | 2.313(2)   | P(1)–O(4)       | 1.536(18)  |
| Cd(1)–O(2)      | 2.331(2)   | P(1)–O(5)       | 1.519(2)   |
| Cd(1)–O(3)      | 2.357(2)   | P(1)–O(6)       | 1.526(18)  |
| Cd(1)–O(4)      | 2.274(19)  | P(1)–O(7)       | 1.623(19)  |
| Cd(1)–N(1)      | 2.365(2)   |                 |            |
| Cd(1)–N(2)      | 2.362(2)   |                 |            |
| O(1)–Cd(1)–O(2) | 89.10(9)   | O(2)–Cd(1)–N(1) | 89.57(8)   |
| O(1)–Cd(1)–O(3) | 173.18(7)  | O(1)–Cd(1)–N(2) | 88.12(7)   |
| O(2)–Cd(1)–O(3) | 85.26(8)   | O(3)–Cd(1)–N(1) | 86.68(9)   |
| O(4)–Cd(1)–O(1) | 93.67(8)   | O(3)–Cd(1)–N(2) | 96.47(8)   |
| O(4)–Cd(1)–O(2) | 174.98(7)  | O(4)–Cd(1)–N(1) | 94.64(7)   |
| O(4)–Cd(1)–O(3) | 91.04(11)  | O(4)–Cd(1)–N(2) | 87.84(7)   |
| O(3)–Cd(1)–N(2) | 86.31(14)  | O(4)–P(1)–O(7)  | 107.18(9)  |
| O(4)–Cd(1)–O(2) | 176.20(13) | O(5)–P(1)–O(4)  | 114.72(11) |
| O(4)–Cd(1)–O(3) | 92.23(8)   | O(5)–P(1)–O(6)  | 112.10(11) |
| O(1)–Cd(1)–N(1) | 89.44(8)   | O(5)–P(1)–O(7)  | 103.26(11) |
| O(1)–Cd(1)–N(2) | 87.16(8)   | O(6)–P(1)–O(4)  | 111.09(10) |
| N(2)–Cd(1)–N(1) | 175.92(7)  | O(6)–P(1)–O(7)  | 107.85(10) |

**Table S10.** Selected H-bonding distances (Å) and angles (°) for complex **5**.

| D–H          | d(D–H) | d(H···A) | ∠DHA  | d(D···A) | A   | Symmetry           |
|--------------|--------|----------|-------|----------|-----|--------------------|
| O(1)–H(1A)   | 0.85   | 1.87     | 176.6 | 2.721    | O6  | [1+X, +Y, +Z]      |
| O(1)–H(1B)   | 0.85   | 1.88     | 167.7 | 2.721    | O12 | [3-X, -1/2+Y, 2-Z] |
| O(2)–H(2A)   | 0.85   | 1.91     | 167.7 | 2.748    | O6  | [3-X, 1/2+Y, 2-Z]  |
| O(2)–H(2B)   | 0.85   | 2.05     | 169.1 | 2.893    | O5  | [1+X, +Y, +Z]      |
| O(3)–H(3A)   | 0.85   | 2.05     | 150.4 | 2.823    | O5  |                    |
| O(3)–H(3B)   | 0.85   | 2.17     | 136.1 | 2.849    | O4  | [3-X, 1/2+Y, 2-Z]  |
| O(9)–H(9A)   | 0.82   | 1.88     | 150.9 | 2.627    | O11 | [2-X, -1/2+Y, 3-Z] |
| O(10)–H(10)  | 0.82   | 2.08     | 166.8 | 2.886    | N4  | [2-X, -1/2+Y, 3-Z] |
| O(12)–H(12A) | 0.85   | 1.86     | 160.0 | 2.671    | O5  |                    |
| O(12)–H(12B) | 0.88   | 2.01     | 150.7 | 2.806    | O13 |                    |

**Table S11.** The metal···metal distances and dihedral angles in complexes **1-5**.

|                             | <b>1</b>    | <b>2</b>    | <b>3</b>    | <b>4</b>    | <b>5</b>  |
|-----------------------------|-------------|-------------|-------------|-------------|-----------|
| metal···metal distances (Å) | 13.8950(31) | 13.8130(51) | 13.6250(19) | 13.5898(15) | 14.109(8) |
| dihedral angles a (°)       | 62.3(3)     | 23.8(4)     | 25.80(17)   | 22.4(2)     | 52.18(11) |

**Table S12.** The intra- and inter-chain  $\pi$ - $\pi$  stacking interactions and the conformation of ribose for complexes **1-5**.

|                                         | <b>1</b> | <b>2</b>       | <b>3</b> | <b>4</b>       | <b>5</b> |
|-----------------------------------------|----------|----------------|----------|----------------|----------|
| $\pi$ - $\pi$ stacking <sup>a</sup> (Å) | –        | 3.732<br>3.969 | –        | 3.736<br>3.881 | –        |
| $\pi$ - $\pi$ stacking <sup>b</sup> (Å) | 3.757    | 3.683<br>3.781 | 3.687    | 3.814<br>3.928 | –        |
| Conformation of ribose                  | <i>T</i> | <i>T</i>       | <i>T</i> | <i>T</i>       | <i>T</i> |
| Dimension                               | 2D       | 1D             | 1D       | 1D             | 1D       |

<sup>a</sup> Intra-chain  $\pi$ - $\pi$  stacking interactions (Å).<sup>b</sup> Inter-chain  $\pi$ - $\pi$  stacking interactions (Å).



## 2. Supporting information of Complex 1

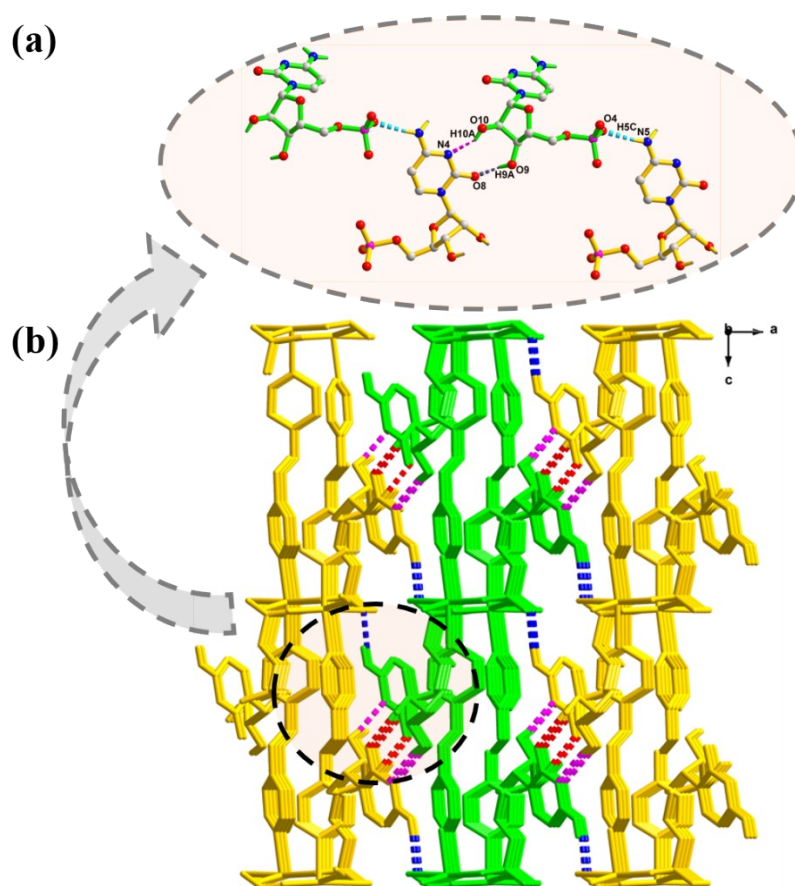

**Figure S1.** (a) The sugar-nucleobase hydrogen bond pairs between CMP ligands as well as phosphate. 3D supramolecular framework based on hydrogen bonding viewed down from the *b*-axis.

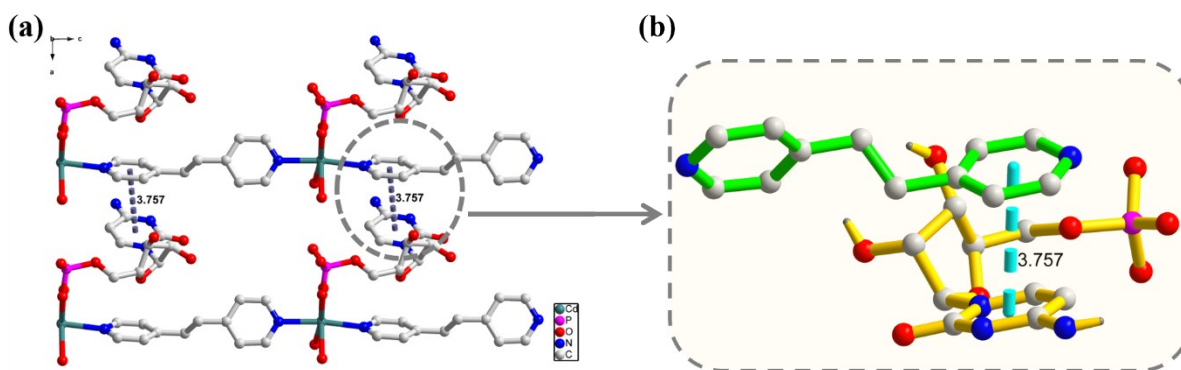

**Figure S2.** 2D structure based on  $\pi$ - $\pi$  stacking interaction viewed down from the *b*-axis.

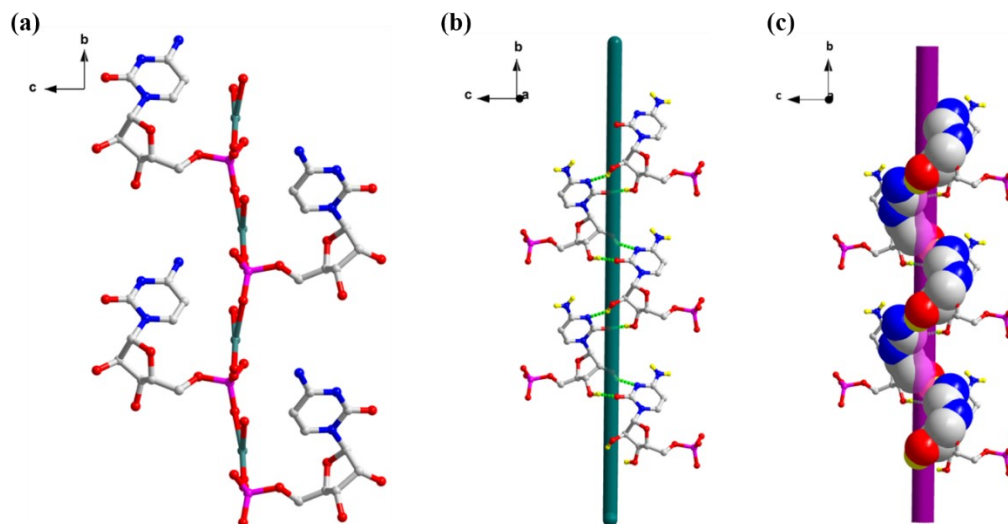

**Figure S3.** (a) 2D coordination polymer formed by nucleotide ligands connecting the cadmium–phosphate chains (green atom shows the six-coordinate cadmium ions). 1,2-bis(4-pyridyl) ethane ligands are omitted for clarity. (b) and (c) Supramolecular helix formed by hydrogen bonding between sugar-nucleobase interaction of **1**.

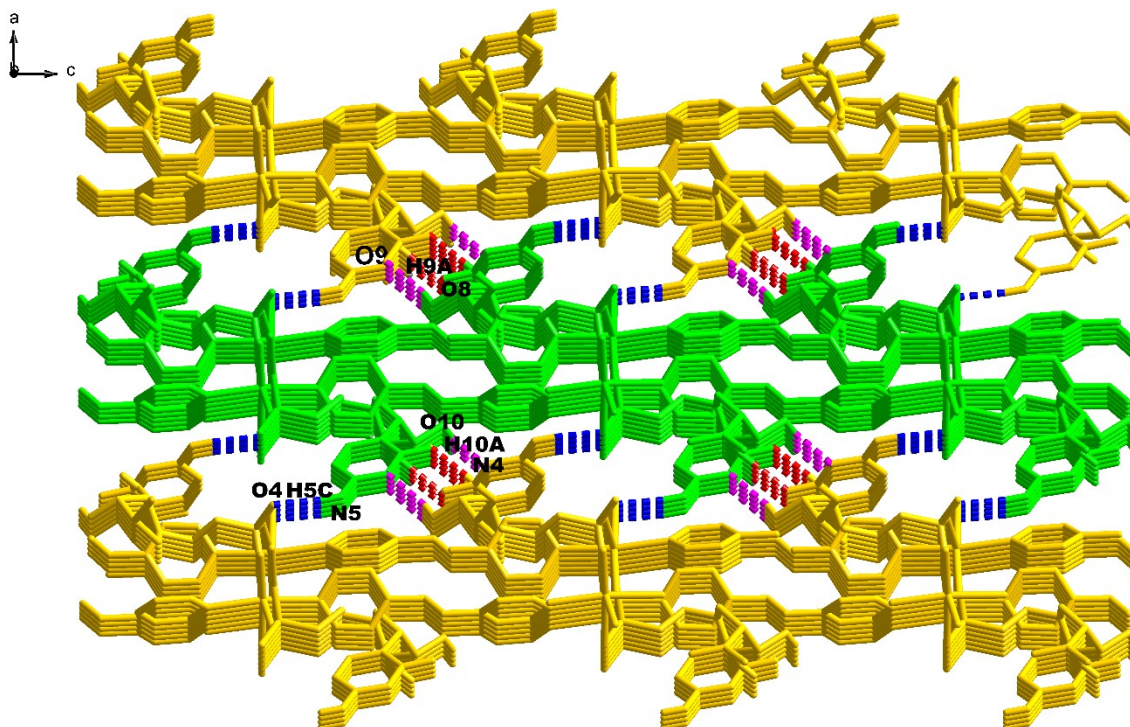

**Figure S4.** 3D supramolecular framework based on hydrogen bonding viewed down from the *b*-axis. The hydrogen bonding of the sugar-ring hydroxyl group to the carbonyl oxygen atom and the imine nitrogen atom of the base (red and pink dashed lines, N4...O10-H10A, 2.046 Å, O9-H9A...O8, 1.810 Å). H-bond between phosphate oxygen and pyrimidine base (blue dashed lines, N5-H5C...O4, 1.994 Å).

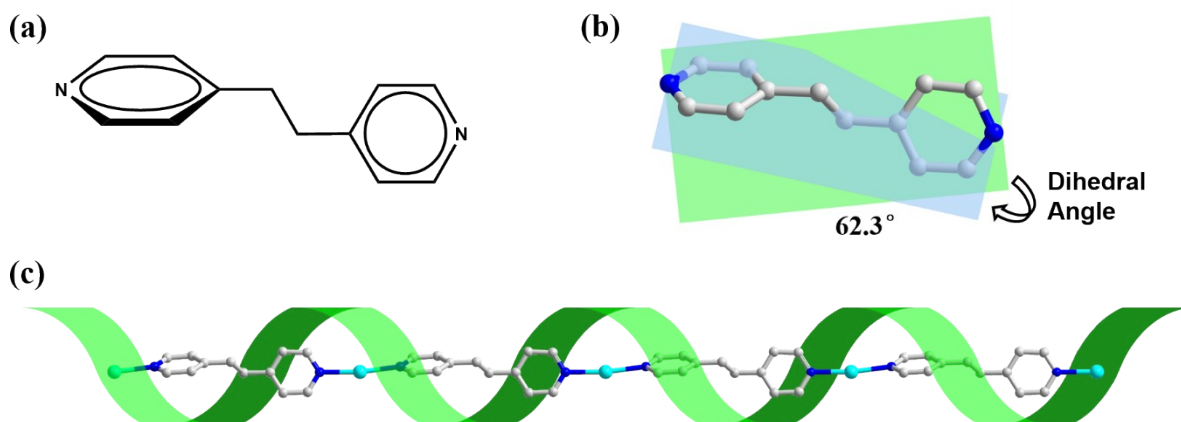

**Figure S5.** The dihedral angle of the plane formed by the methylene and pyridine ring in bpa ligand complex 1.

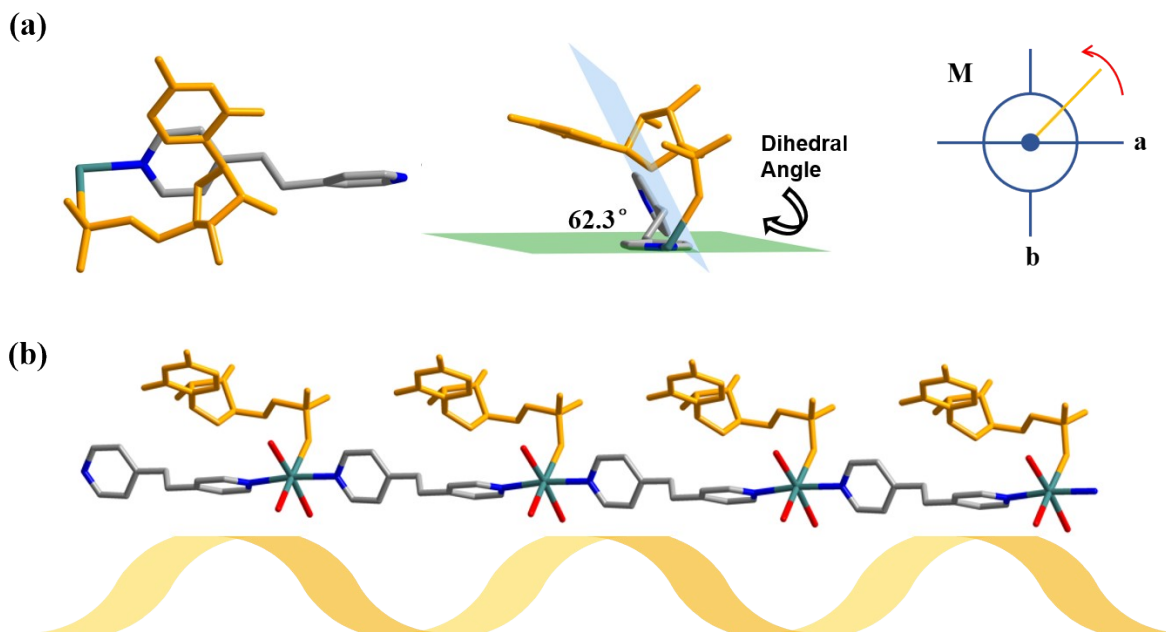

**Figure S6.** (a) The dihedral angle of bpa in complex 1; the counter-clockwise orientated nucleotide ligand inducing *M*-supramolecular chirality. (c) EAC chirality in complex 1 generated from M-L coordination and inducement of chiral nucleotides.

### 3. Supporting information of Complex 2

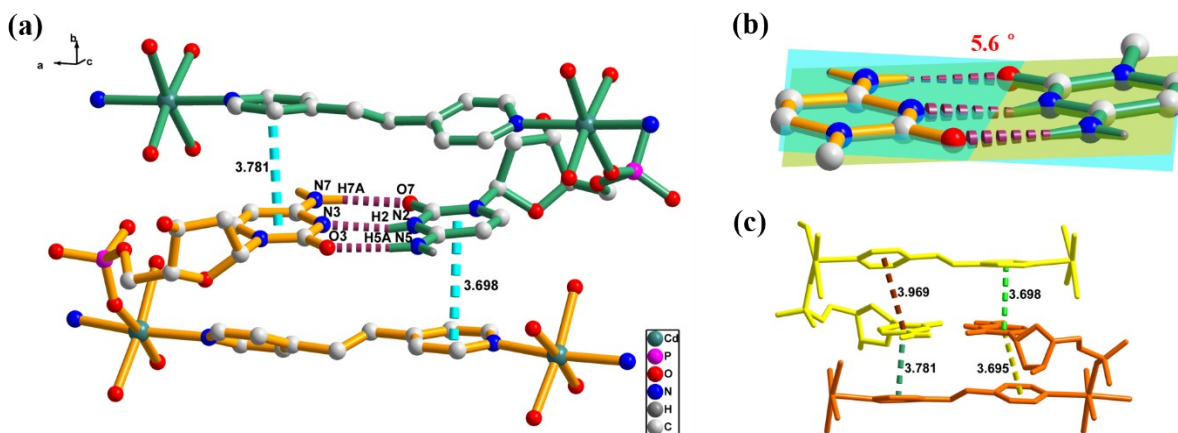

**Figure S7.** (a) i-motif and  $\pi$ - $\pi$  stacking interactions and complementary H-bonding between nucleobases. (b) i-motif angle in complex **2**, (c) the i-motif further stabilized by H-bonding and  $\pi$ - $\pi$  stacking interactions.

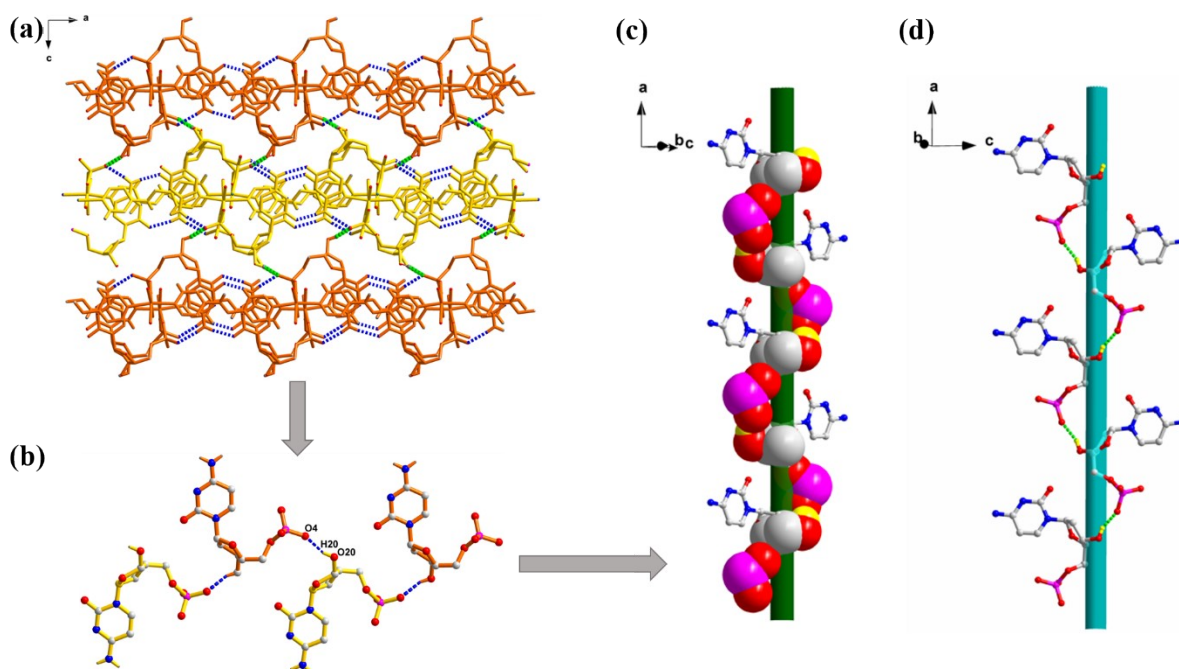

**Figure S8.** (a) The 3D supramolecular structure of **2** assembled by O20–H20···O4 representing in green dotted, H-bonding between the phosphate group and O-H donors of hydroxy of pentose (O20–H20···O4 2.08 Å, 2.77 Å, 142°). (b) H-bonding between pyrimidine base and the phosphate group in complex **2**. (c) and (d) Supramolecular helix based on hydrogen bond forming between the oxygen of phosphate group and hydroxy group of pentose (O20–H20···O4 2.08 Å, 2.77 Å, 142°) of **2**.



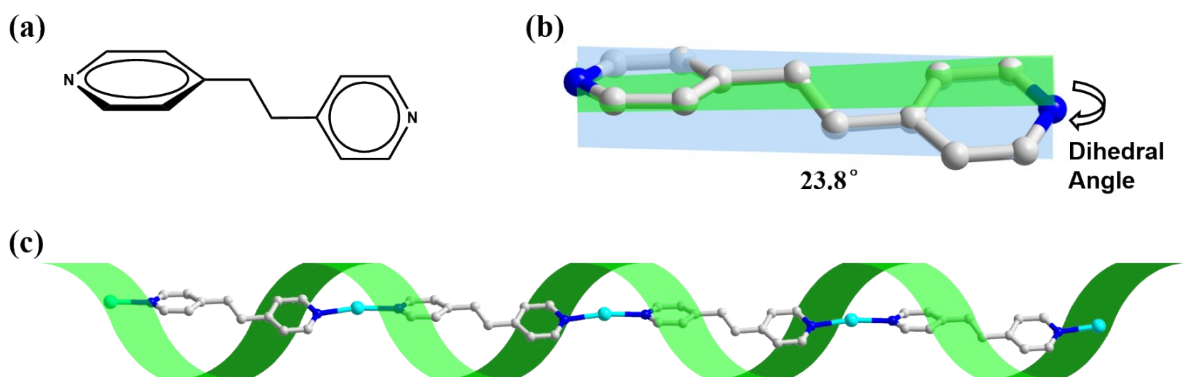

**Figure S9.** The dihedral angle of the plane formed by the methylene and pyridine-ring in bpa ligand complex **2**.

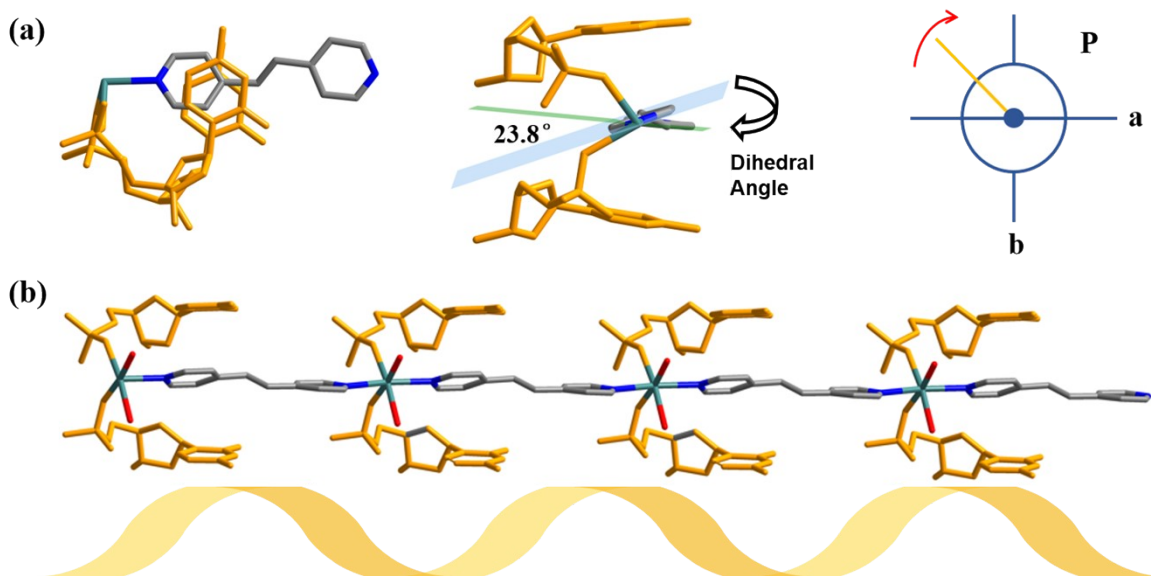

**Figure S10.** (a) The dihedral angle of bpa in complex **2** the clockwise-orientated nucleotide ligand inducing *P*-supramolecular chirality. (c) EAC chirality in complex **2** generated from M-L coordination and inducement of chiral nucleotides.

#### 4. Supporting information of Complex 3

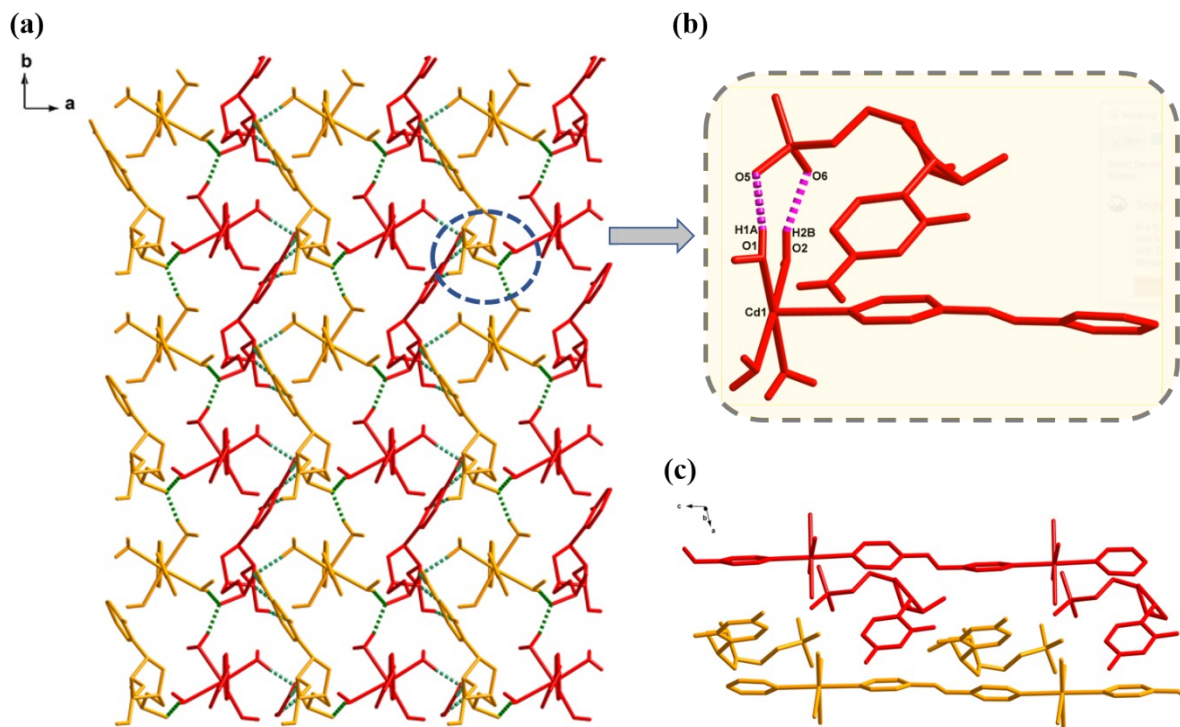

**Figure S11.** (a) and (b) The 3D supramolecular structure formed by hydrogen bonds between the coordinated water molecules and acceptor atoms from the  $\text{CMP}^{2-}$  ligands.

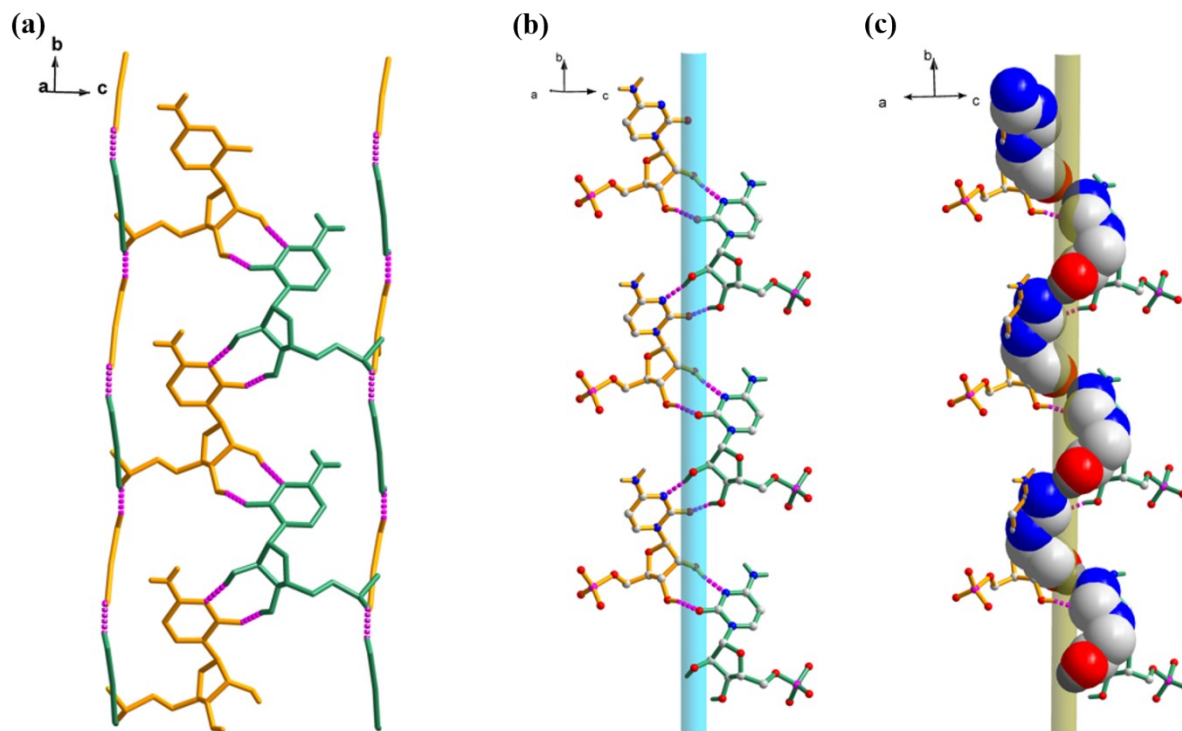

**Figure S12.** (a) 3D framework formed by nucleotide ligands connecting by hydrogen bonding. (b) and (c) Supramolecular helix formed by hydrogen bonding between sugar-nucleobase interaction of **3**, azpy ligands are omitted for clarity.



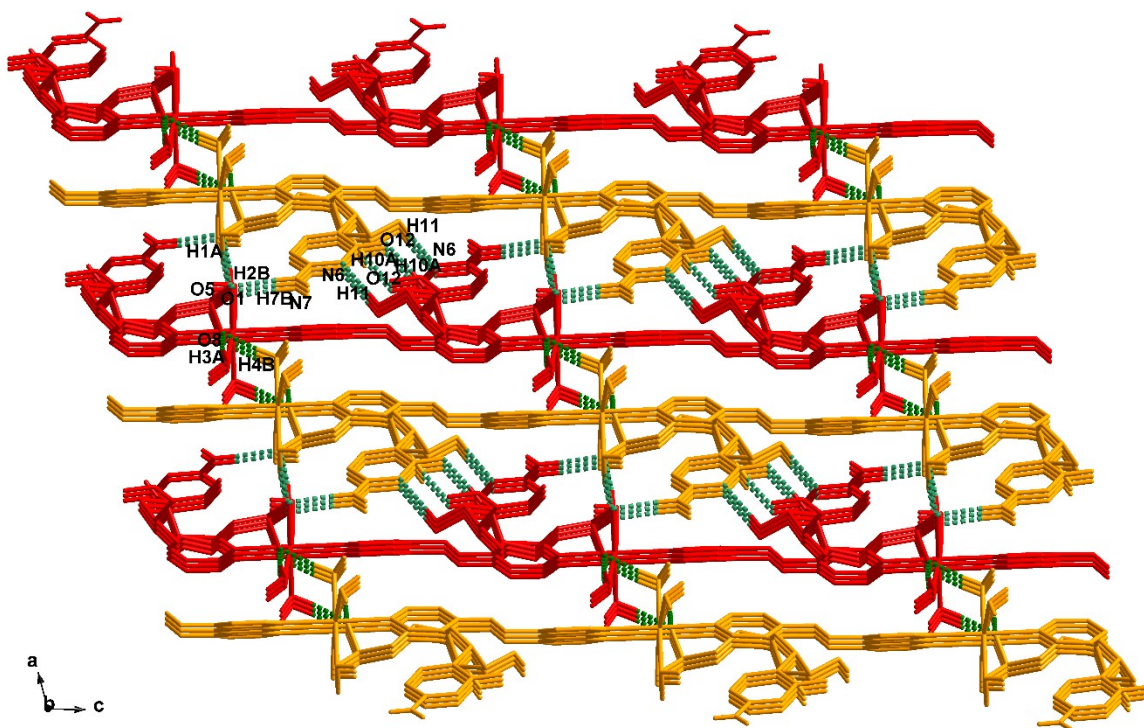

**Figure S13.** 3D supramolecular framework based on hydrogen bonding viewed down from the *b*-axis. The hydrogen bonding of the sugar-ring hydroxyl group to the carbonyl oxygen atom and the imine nitrogen atom of the base (green dashed lines, (O11–H11 $\cdots$ N6), 0.82 Å, 2.05 Å, 168°; O10–H10A $\cdots$ O12, 0.82 Å, 1.78 Å, 164°), hydrogen bond between phosphate oxygen and pyrimidine base as well as the coordination water and the phosphate oxygen atom (O1–H1A $\cdots$ O5, 0.85 Å, 1.81 Å, 171°; O2–H2B $\cdots$ O6, 0.85 Å, 1.88 Å, 159°).

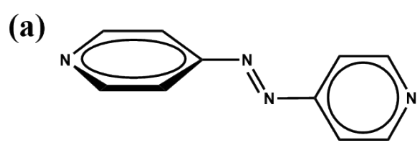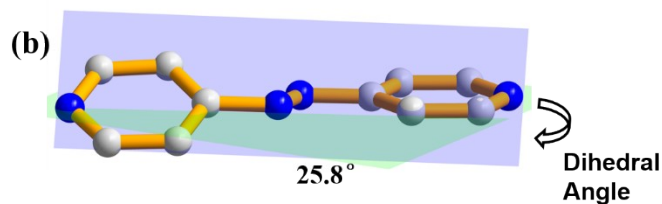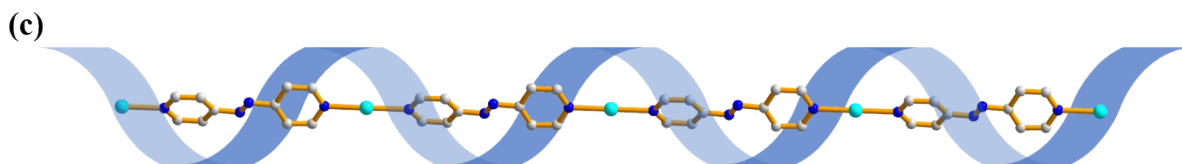

**Figure S14.** The dihedral angle of the plane formed by the methylene and pyridine ring in azpy ligand complex **3**.

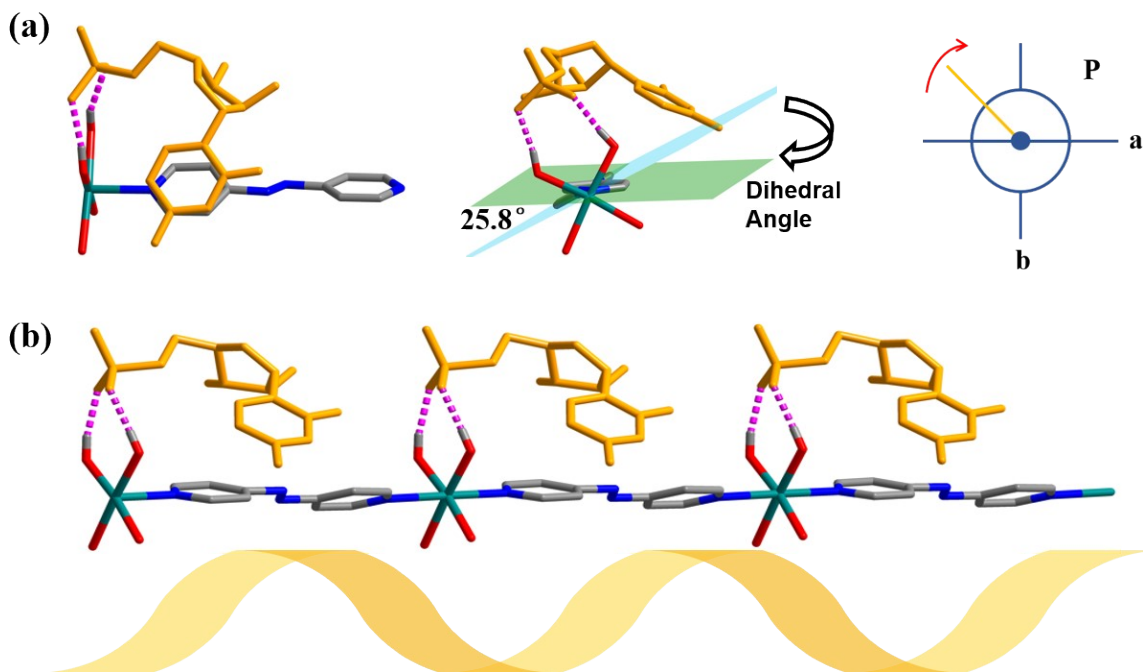

**Figure S15.** (a) The dihedral angle of azpy in complex **3** the clockwise-orientated nucleotide ligand inducing *P*-supramolecular chirality. (c) EAC chirality in complex **3** generated from M-L coordination and inducement of chiral nucleotide.

## 5. Supporting information of Complex 4

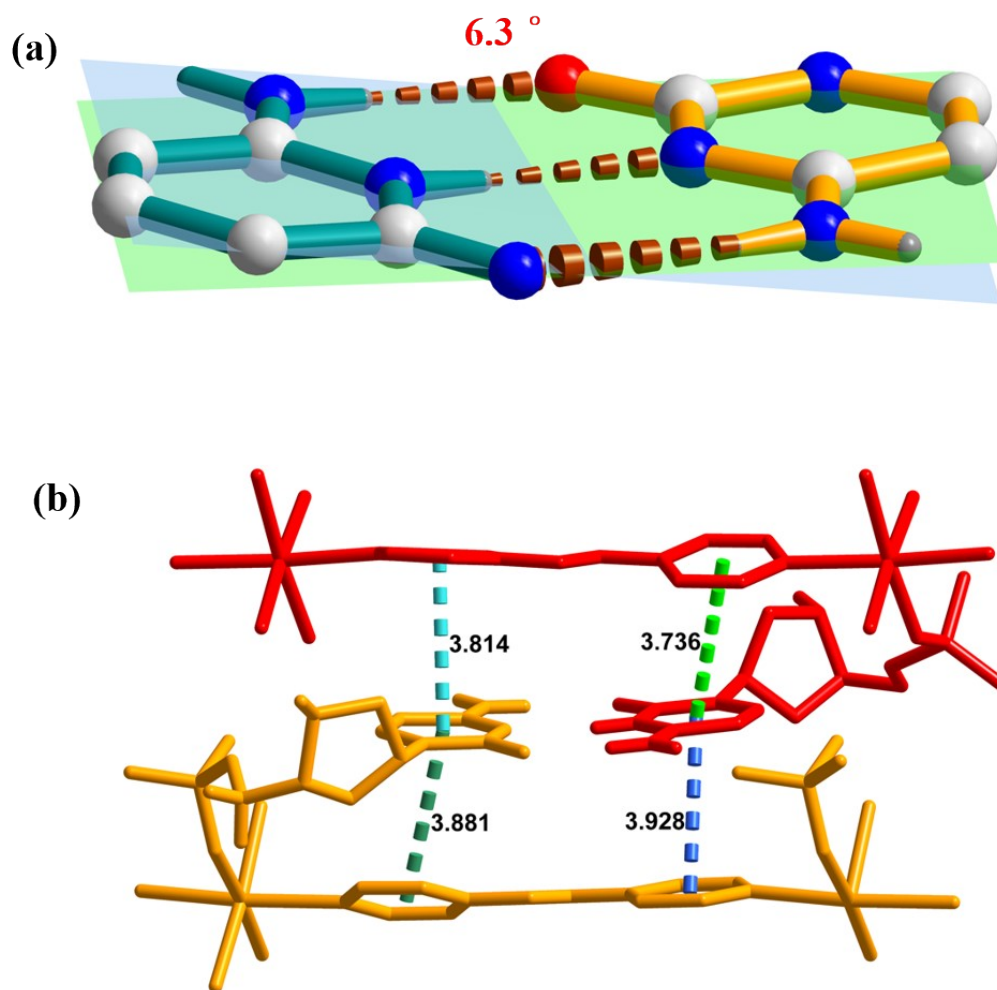

**Figure S16.** (a) i-motif angle in complex 4, and complementary H-bonding between nucleobases. (b) the i-motif is further stabilized by  $\pi$ - $\pi$  stacking interactions.

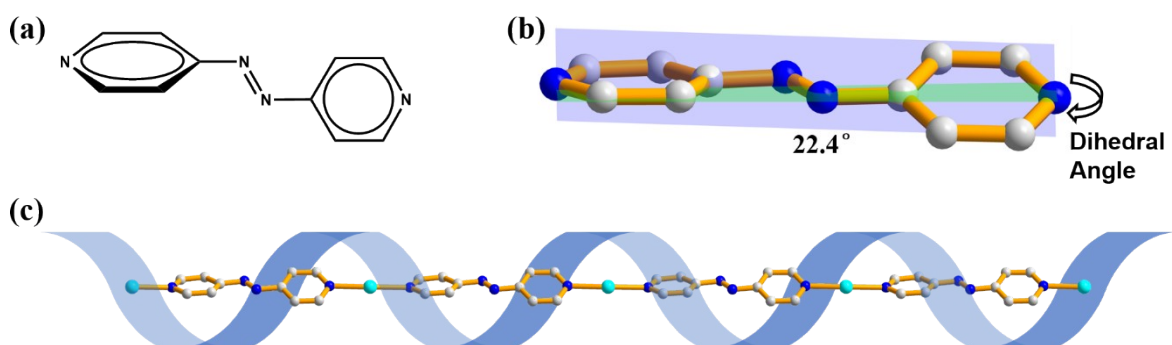

**Figure S17.** The dihedral angle of the plane formed by the methylene and pyridine ring in azpy ligand complex 4.

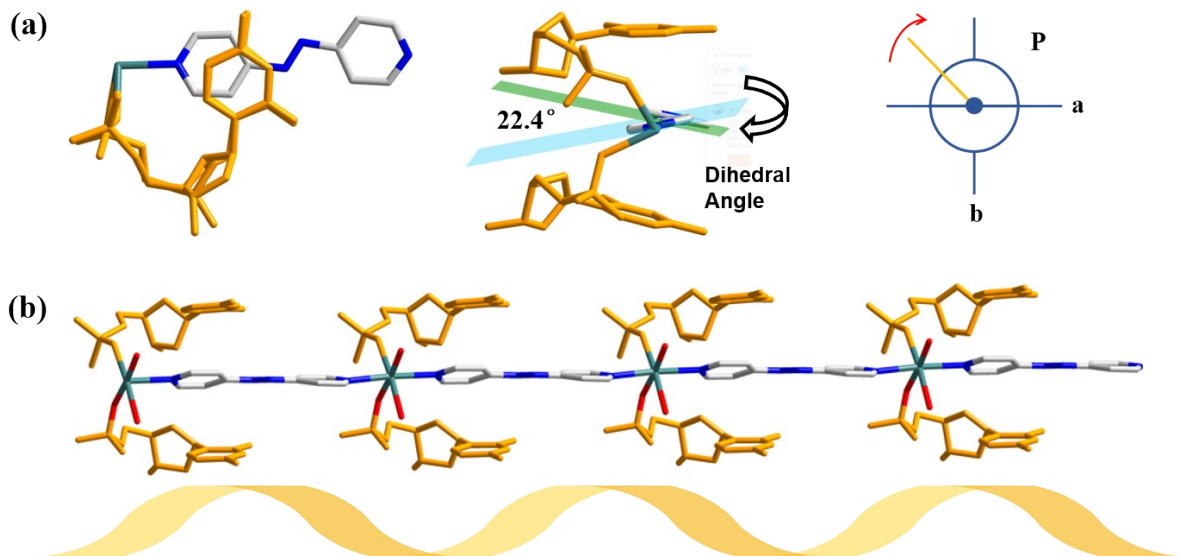

**Figure S18.** (a) The dihedral angle of azpy in complex 4 the clockwise-orientated nucleotide ligand inducing *P*-supramolecular chirality. (c) EAC chirality in complex 4 generated from M-L coordination and inducement of chiral nucleotides.

## 6. Supporting information of Complex 5

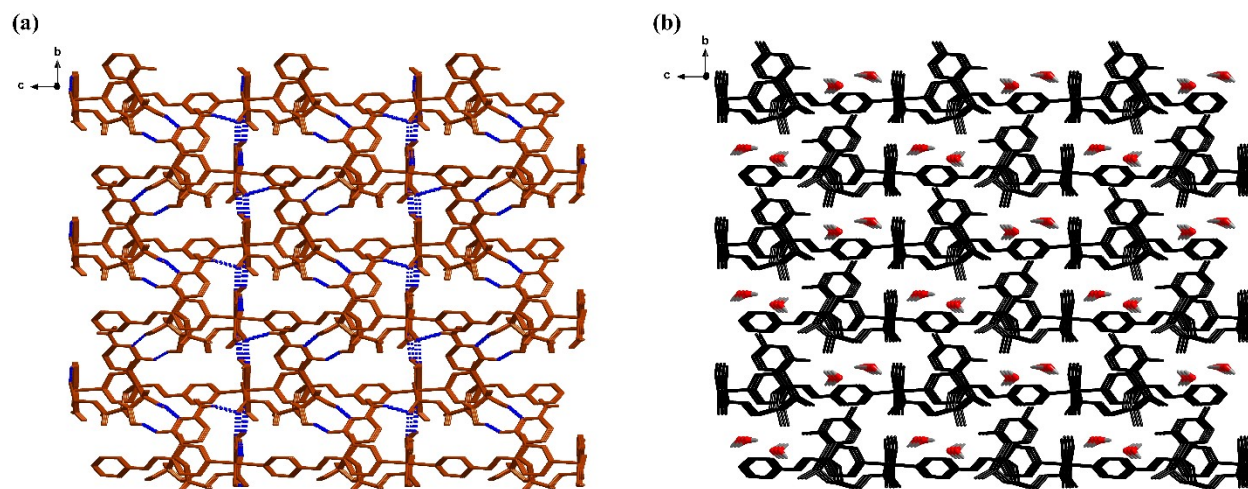



**Figure S19.** (a) 3D coordination network of complex **5** formed by hydrogen bonding between sugar-nucleobases viewed down from *a* axis. (b) Detail of the channels that are formed in the 3D polymeric structure of **5** that are filled with water molecules.

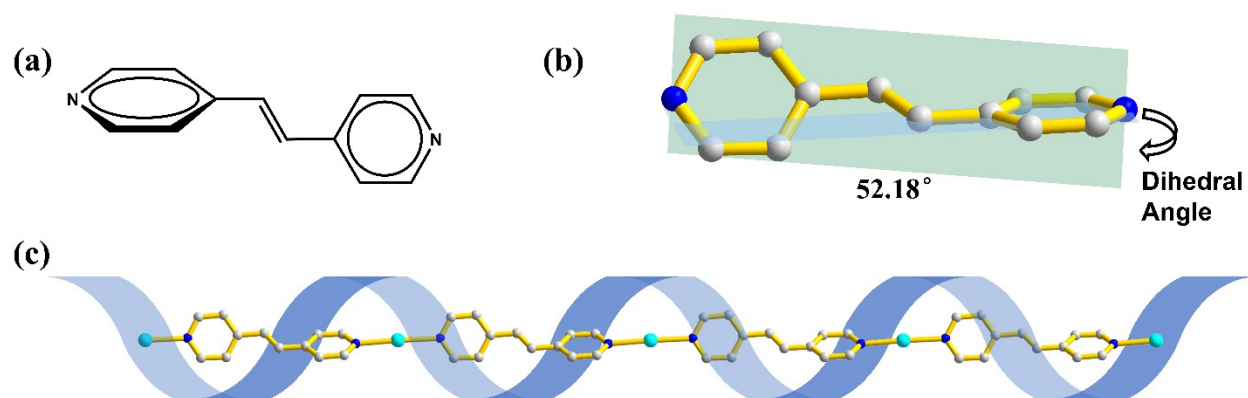

**Figure S20.** The dihedral angle of the plane formed by the methylene and pyridine ring in bpe ligand complex **5**.

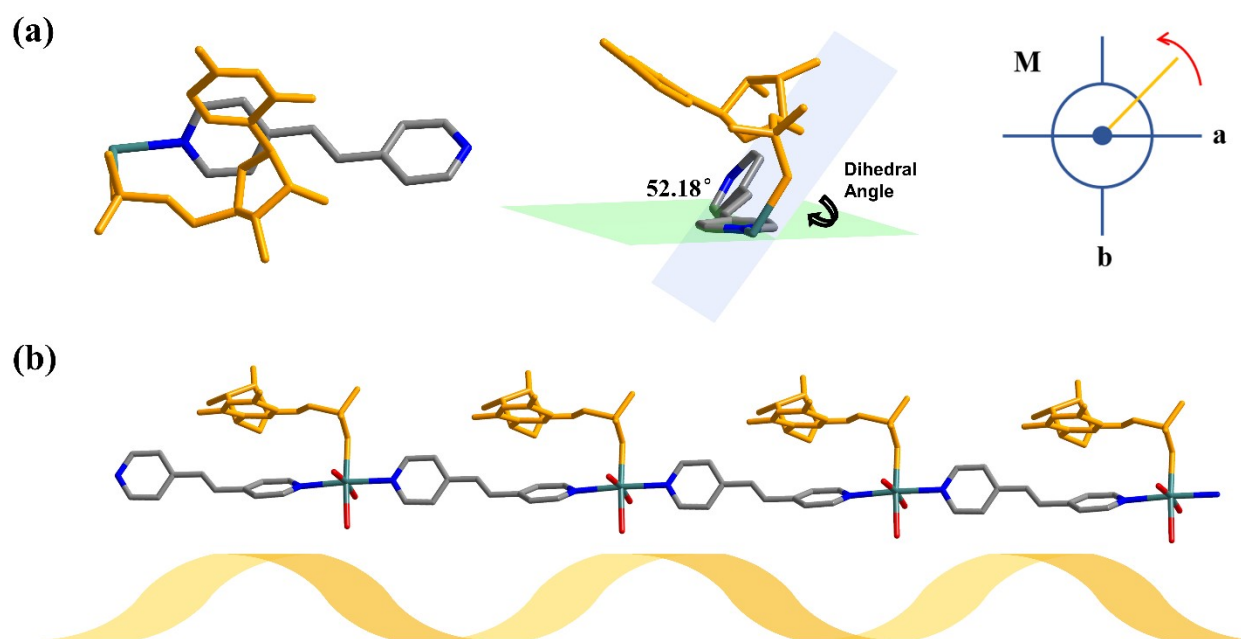

**Figure S21.** (a) The dihedral angle of bpa in complex **5**; the counter-clockwise orientated nucleotide ligand inducing *M*-supramolecular chirality. (c) EAC chirality in complex **5** generated from M-L coordination and inducement of chiral nucleotides.

## 7. The PXRD Patterns of complexes 1-5

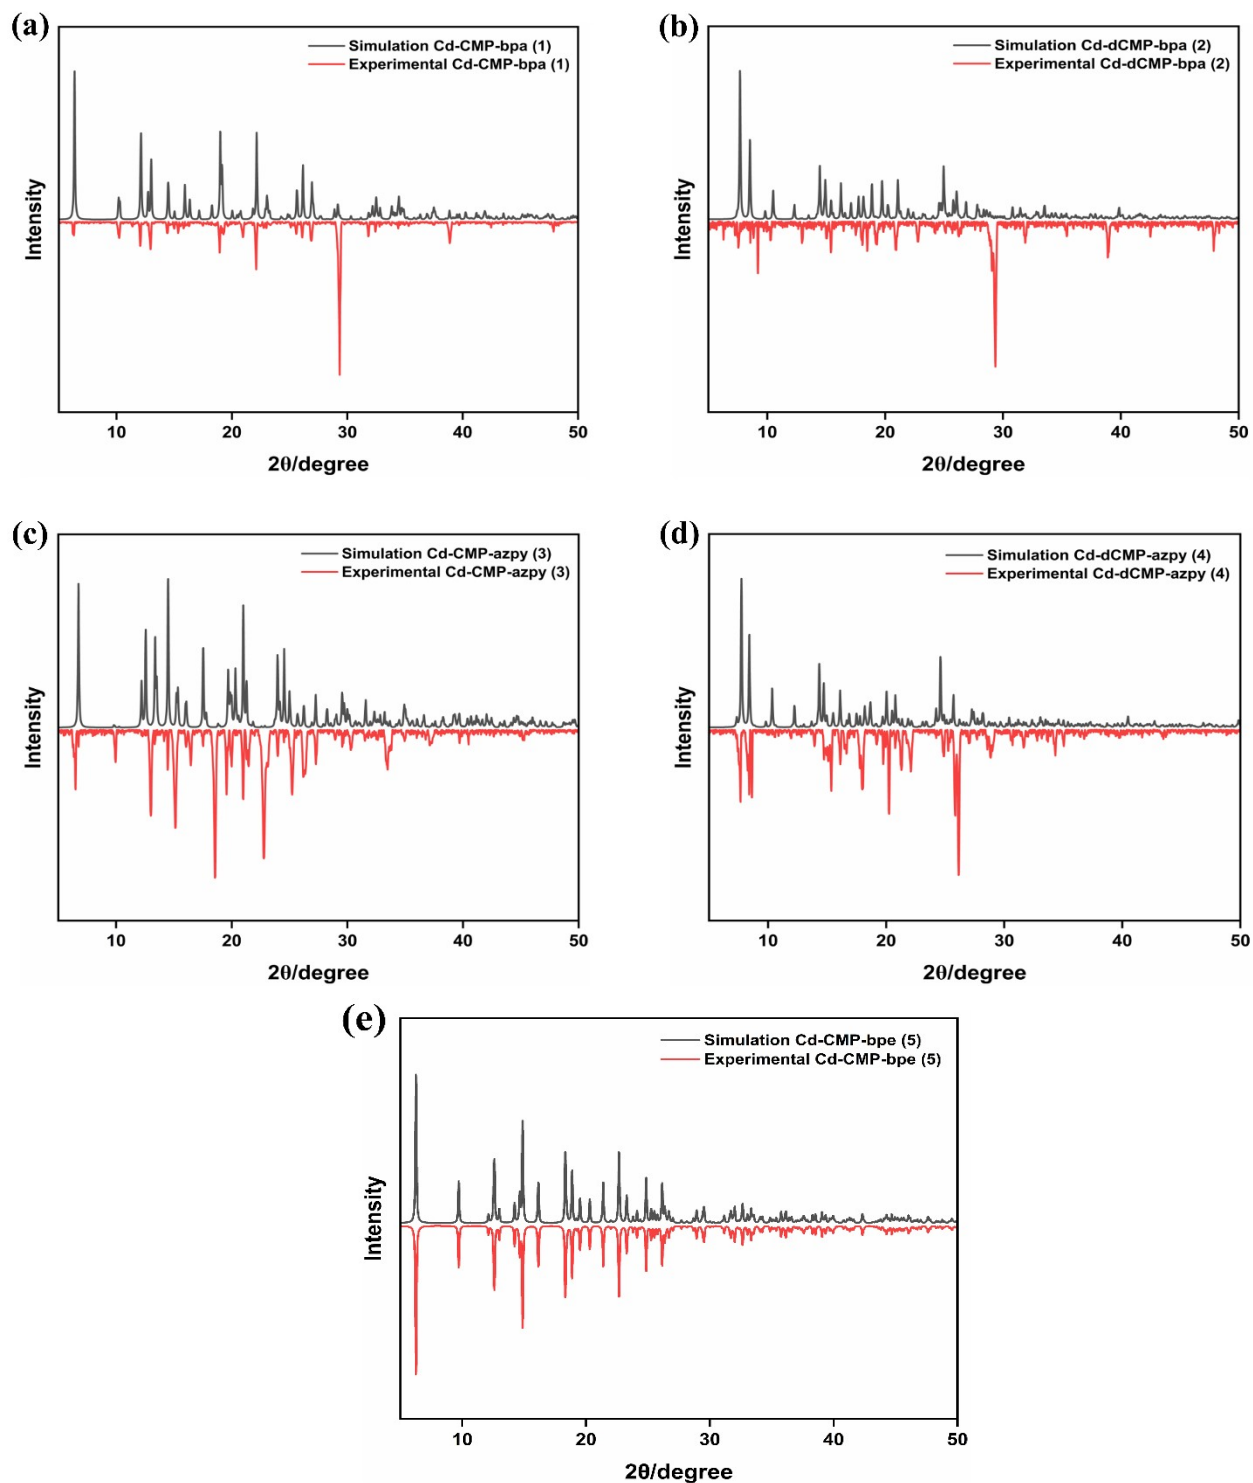

Figure S22. PXRD patterns show the comparison between the experimental values and calculated ones for (a) complex 1, (b) complex 2, (c) complex 3, (d) complex 4, and (e) complex 5.

## 8. The FT-IR Spectra of complexes 1-5

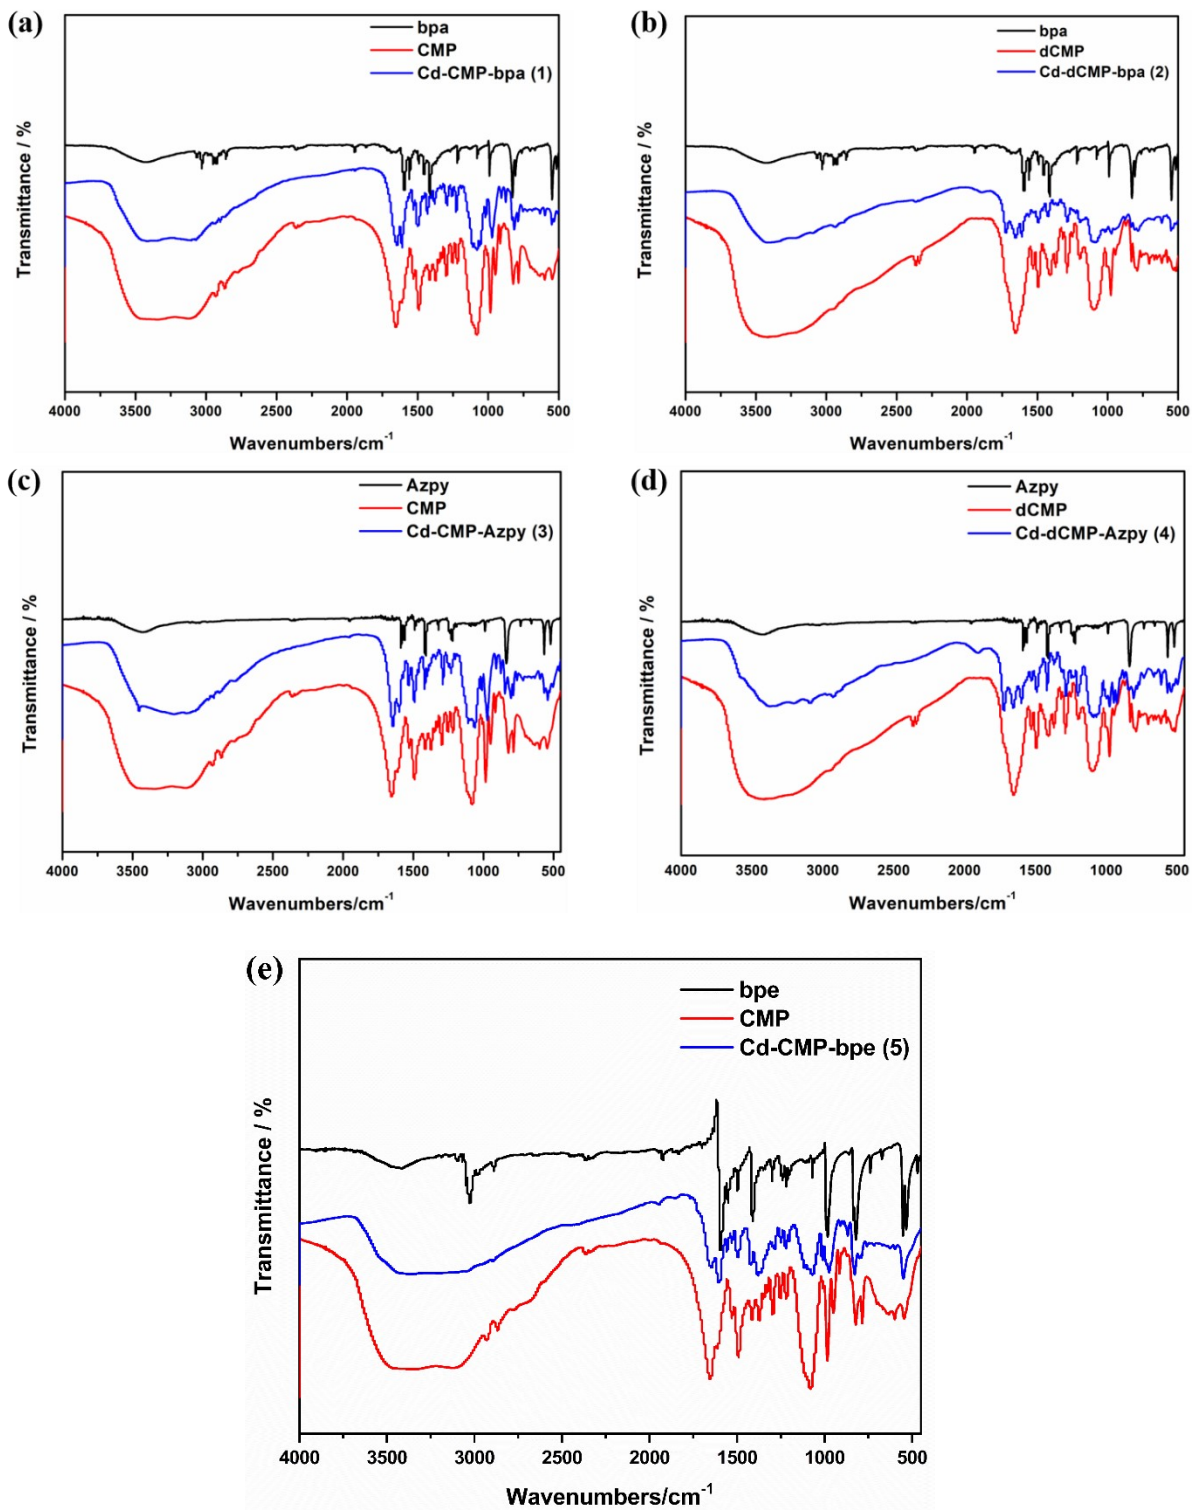

**Figure S23.** IR spectra of (a) CMP, bpa, and complex 1; (b) dCMP, bpa, and complex 2; (c) CMP, azpy, and complex 3; (d) dCMP, azpy, and complex 4, CMP, bpe and complex 5.

### 9. The Solution-State UV/*vis* Spectra of complexes 1-4

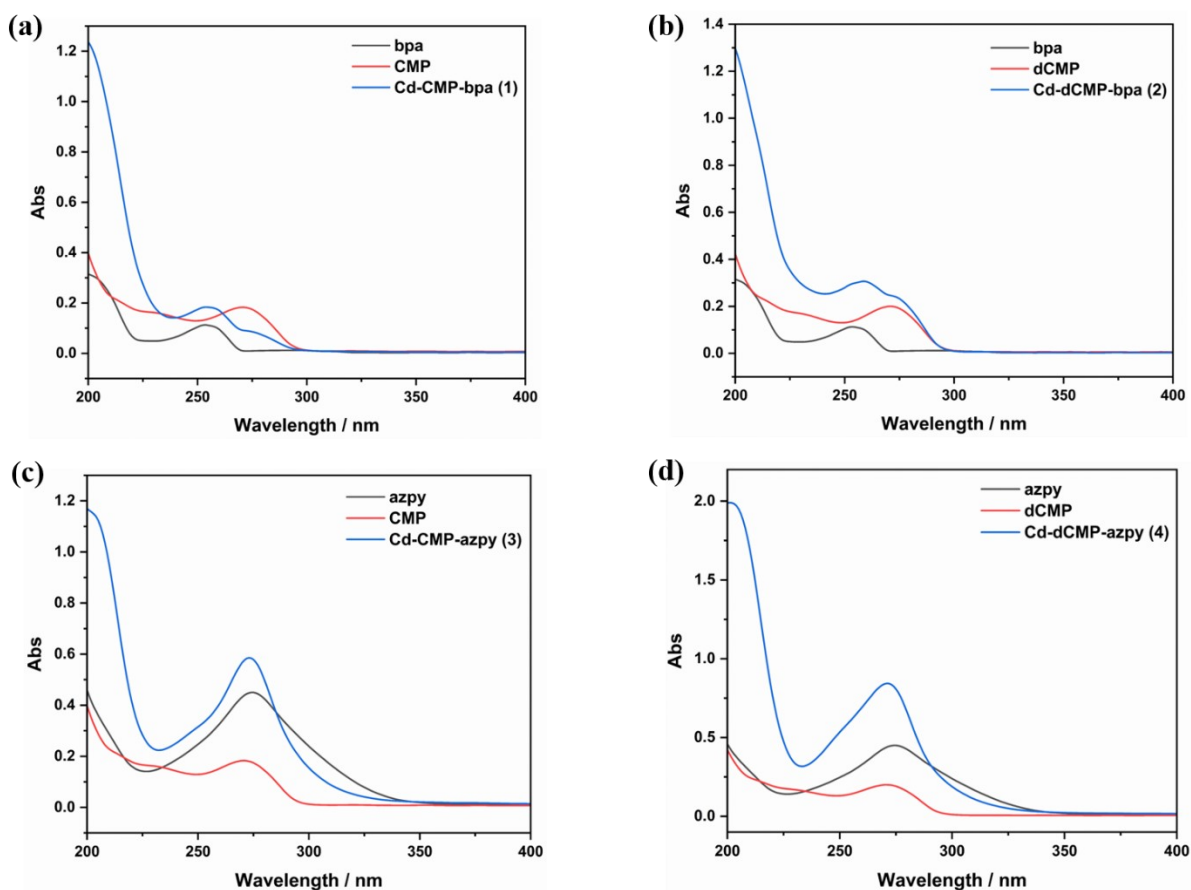

**Figure S24.** The solution-state UV/*vis* absorption spectra of (a) CMP, bpa, and complex 1; (b) dCMP, bpa, and complex 2; (c) CMP, azpy, and complex 3; (d) dCMP, azpy, and complex 4; (c) The relative absorption peaks. The spectra were obtained by measuring  $2.5 \times 10^{-5} \text{ mol} \cdot \text{L}^{-1}$  solution in a 1 cm cell.



## 10. The Solid-State UV/*vis* Spectra of complexes 1-5

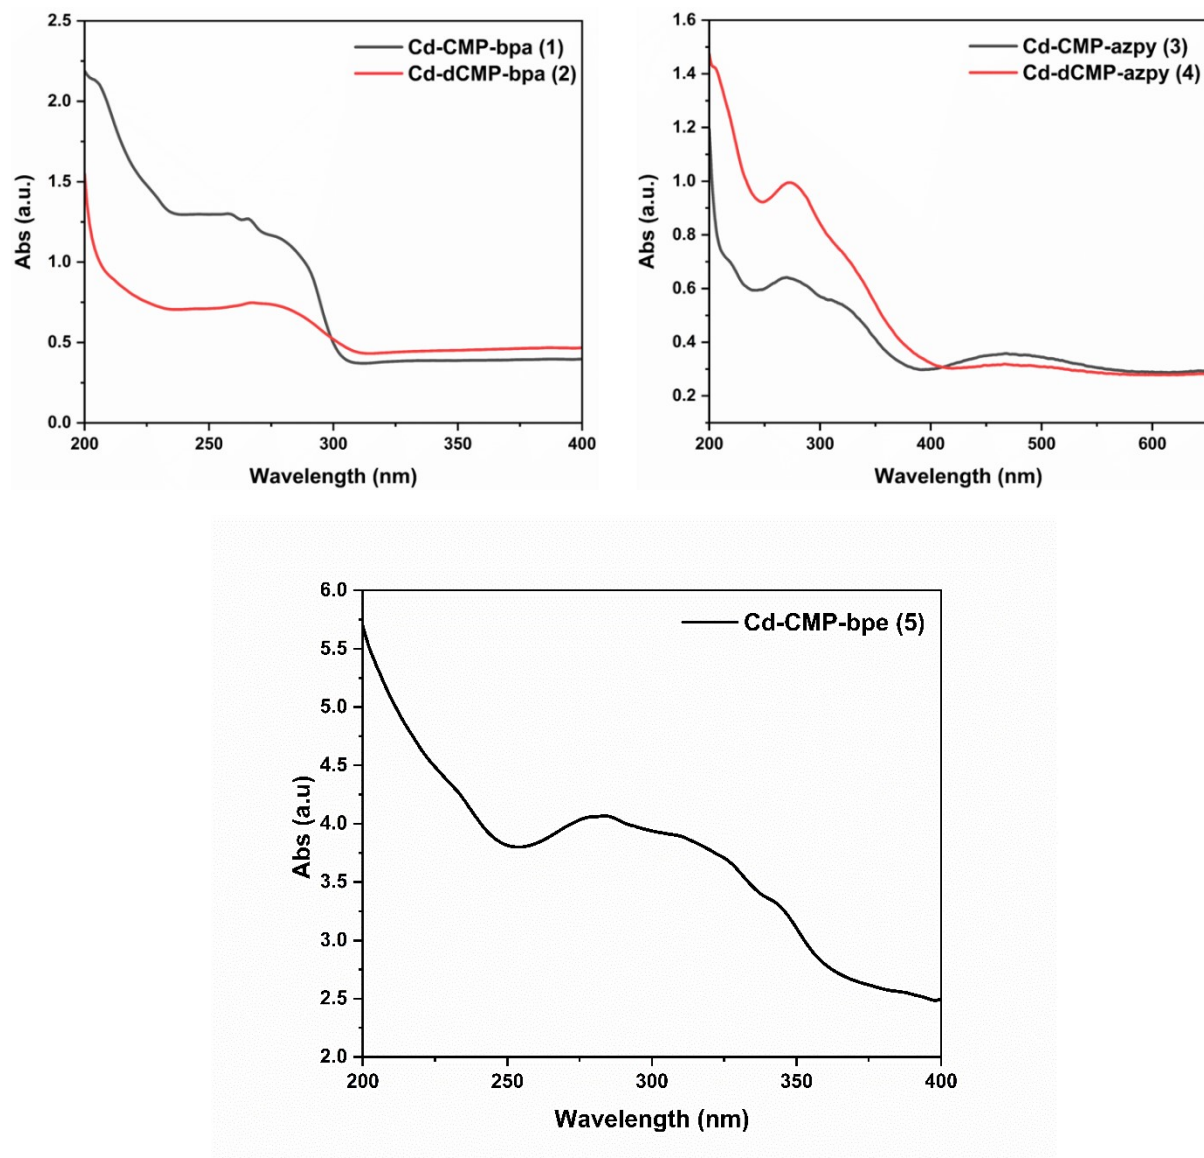

**Figure S25.** The solid-state UV/*vis* spectra of complexes **1-5** at room temperature. There exist d-d electron transitions in the region of 400-600 nm for complexes **3** and **4**.

## 11. The Solution-State CD spectra of CMP, dCMP, and complexes

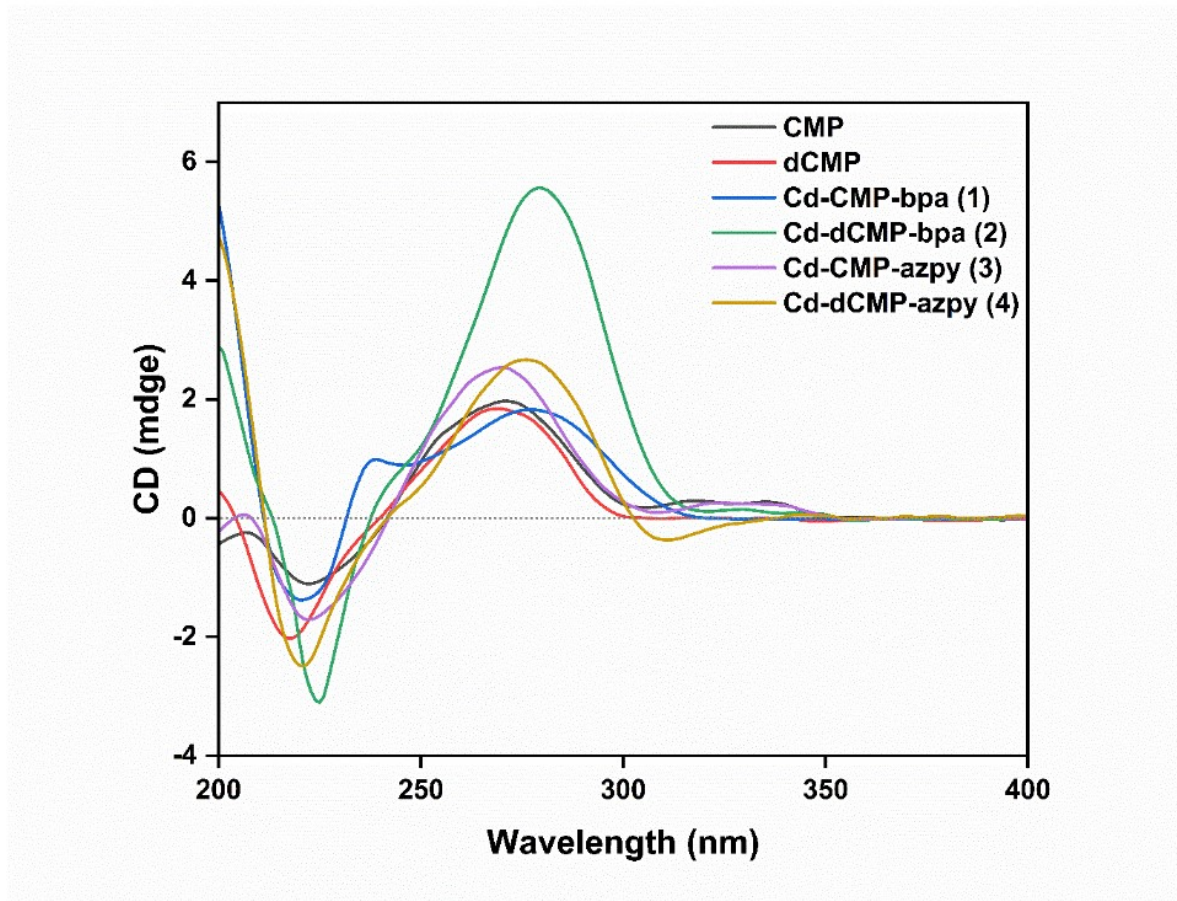

**Figure S26.** The solution-state CD spectra of CMP, dCMP, and complexes at room temperature, the spectra were obtained by measuring  $2.5 \times 10^{-5} \text{ mol} \cdot \text{L}^{-1}$  water solution in a 1 cm cell.

## 12. The Thermo-Gravimetric Analysis of complexes 1-5

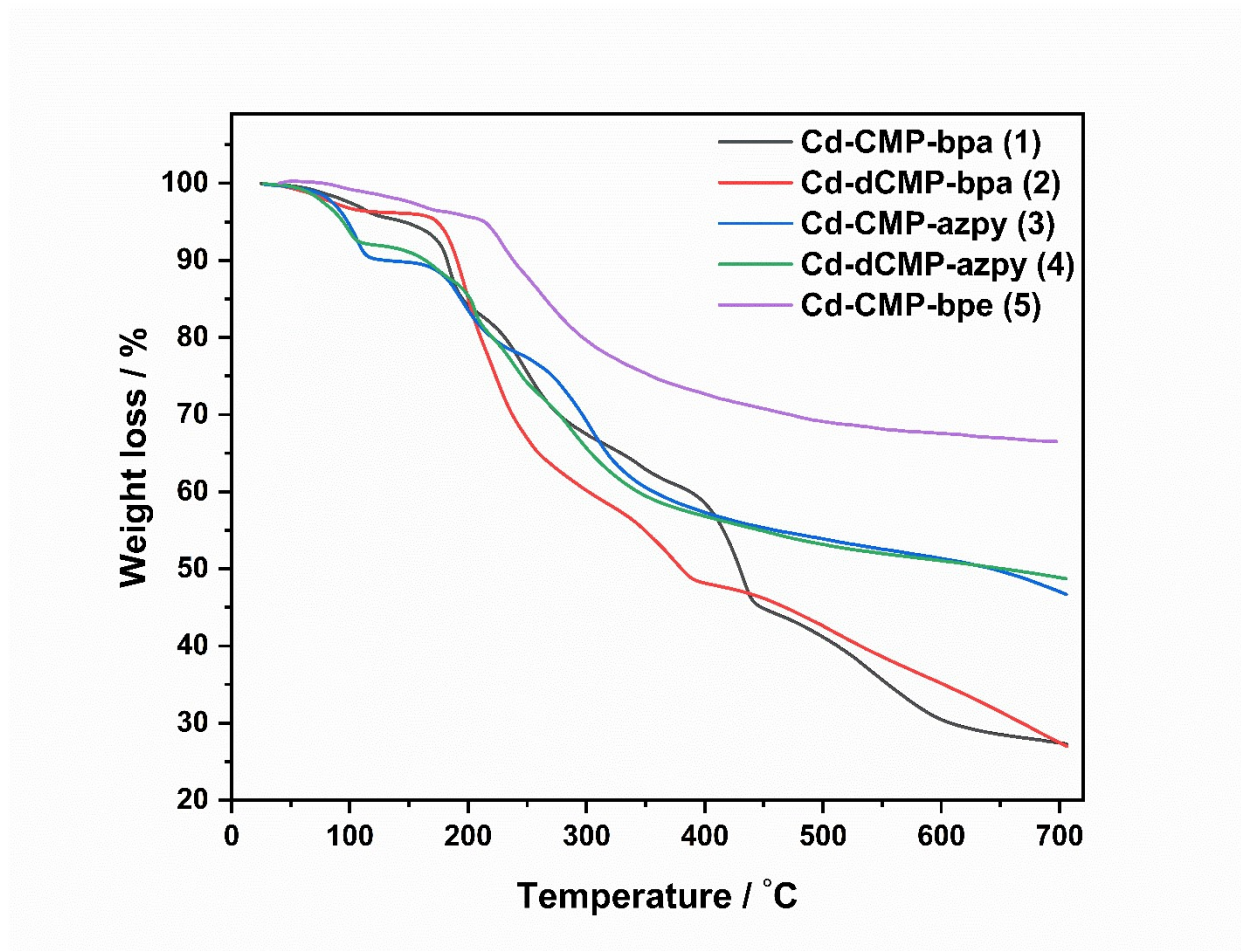

**Figure S27.** TG curves of complexes 1-5.
